# Supplementary material for: Setting Goals to Reduce Cardiovascular Risk: A Retrospective Chart Review of a Pharmacist-Led Initiative in the Workplace
Source: MDPI journal article supplement (doi:10.3390/ijerph20010846), 2023-01-02
Supplement: s1 [file s1]

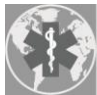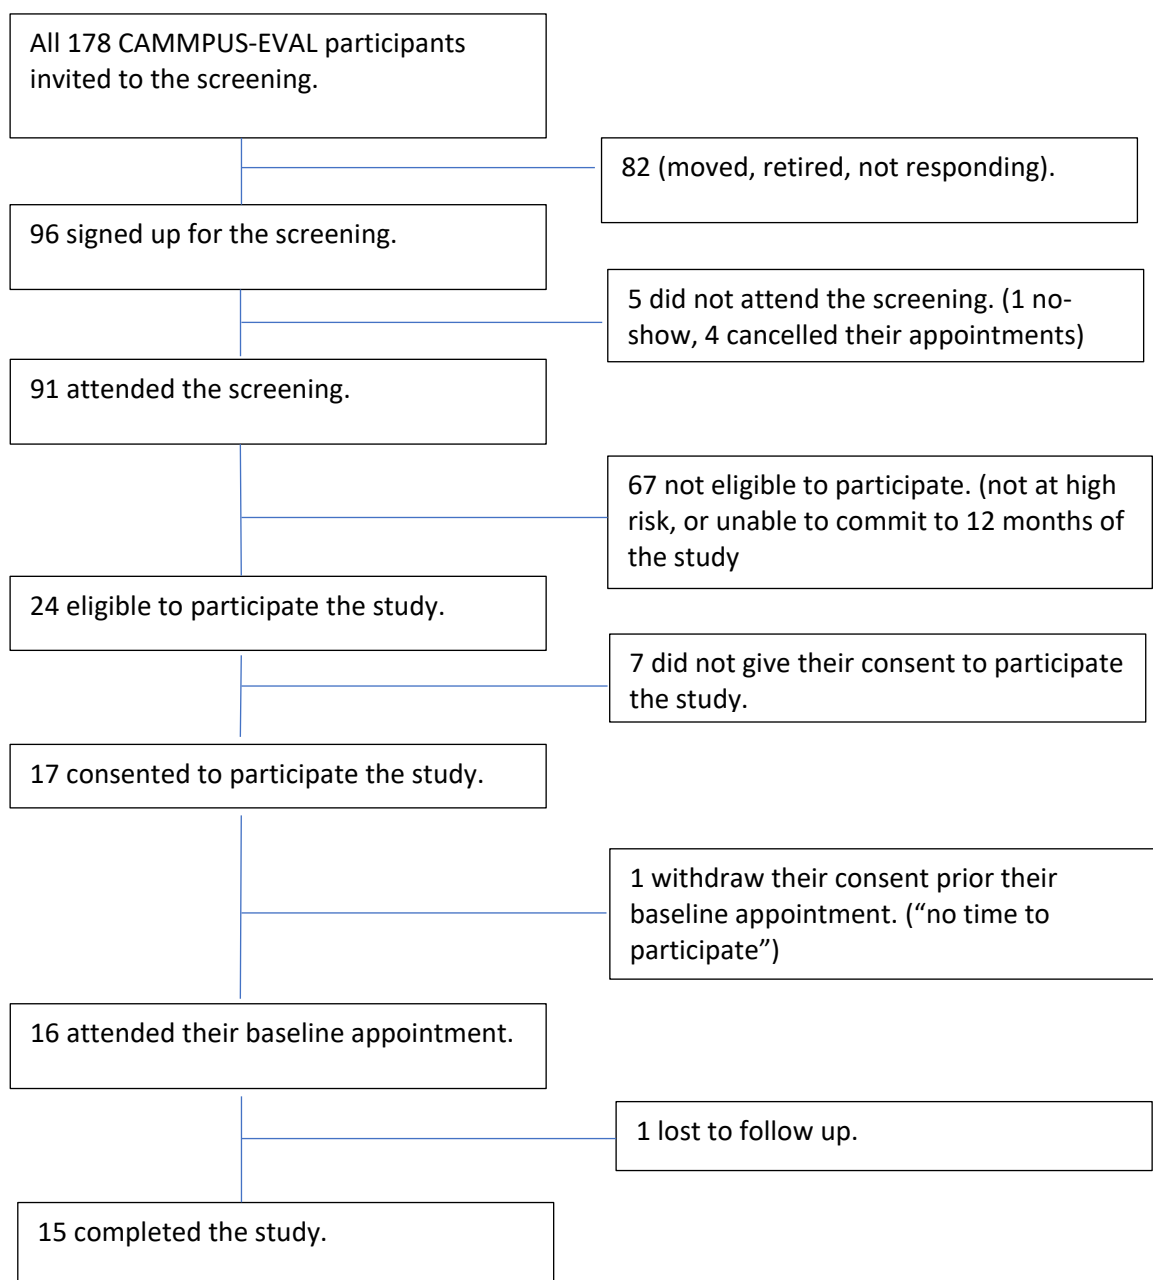

**Supplementary Figure S1.** Flow chart of patient selection and study sample size.

**Supplementary Table S1.** CAMMPUS 2.0 Goal-Setting Questions.*Provider Questions*

---

1. *What is the general domain that the participant wants to work on?*
2. *What exactly are you going to do?*
3. *When exactly are you going to do it?*
4. *How often are you going to do this?*
5. *Where will you do this?*
6. *Are there any challenges or barriers that you anticipate?*
7. *How confident are you in achieving this goal? (from 0 - not at all, to 10 - completely)*
8. *When do you plan to start this action plan (if too far away, ask what they feel ready to start now)*
